# Supplementary material for: Gene expression bias between the subgenomes of allopolyploid hybrids is an emergent property of the kinetics of expression
Source: PubMed Central journal article supplement (PMC10817154; doi:10.1371/journal.pcbi.1011803), 2024-01-16
Supplement: pcbi.1011803.s001.pdf [file pcbi.1011803.s001.pdf]

**Supplemental Table: Genome sizes for progenitors of recent allopolyploids**

| <b>Progenitor Species</b>     | <b>Allopolyploid descendent</b>       | <b>Genome Size</b>                | <b>Reference</b>                      |
|-------------------------------|---------------------------------------|-----------------------------------|---------------------------------------|
| <i>Gossypium raimondii</i>    | Cotton ( <i>G. hirsutum</i> )         | 775.2 MB                          | [1]                                   |
| <i>Gossypium arboreum</i>     | Cotton ( <i>G. hirsutum</i> )         | 1,694 MB                          | [2]                                   |
| <i>Aegilops tauschii</i>      | Wheat ( <i>T. aestivum</i> )          | 4,025 MB                          | [3]                                   |
| <i>Triticum urartu</i>        | Wheat ( <i>T. aestivum</i> )          | 4,790                             | [4]                                   |
| <i>Aegilops speltoides</i>    | Wheat ( <i>T. aestivum</i> )          | 5130MB                            | [5]                                   |
| <i>Fragaria chiloensis</i>    | Strawberry ( <i>F. × ananassa</i> )   | 824.2-839.9MB <sup>a</sup>        | [6]                                   |
| <i>Fragaria virginiana</i>    | Strawberry ( <i>F. × ananassa</i> )   | 769.2-787.8MB <sup>a</sup>        | [6]                                   |
| <i>Tragopogon dubius</i>      | <i>T. miscellus</i> / <i>T. mirus</i> | 10.8,10.83,11.76 pg <sup>b</sup>  | [7]                                   |
| <i>Tragopogon pratensis</i>   | <i>T. miscellus</i>                   | 11.08,11.59,12.44 pg <sup>b</sup> | [7]                                   |
| <i>Tragopogon porrifolius</i> | <i>T. mirus</i>                       | 13.7,12.50 pg <sup>b</sup>        | [7]                                   |
| <i>Coffea eugenioides</i>     | <i>C. arabica</i>                     | 1.36 pg <sup>c</sup>              | [8]                                   |
| <i>Coffea canephora</i>       | <i>C. arabica</i>                     | 1.43 pg <sup>c</sup>              | [8]                                   |
| <i>Brassica oleracea</i>      | <i>B. napus</i>                       | 488MB                             | [9]                                   |
| <i>Brassica rapa</i>          | <i>B. napus</i>                       | 285MB                             | [10]                                  |
| <i>Arabidopsis thaliana</i>   | <i>A. suecica</i>                     | 125MB                             | [11, 12]                              |
| <i>Arabidopsis arenosa</i>    | <i>A. suecica</i>                     | 149.7MB                           | NCBI:<br>GCA_905216605.1 <sup>d</sup> |

<sup>a</sup>: Genome size used in Figure 5 is the average of these values.

<sup>b</sup>: Values given in picograms of DNA per 4C: points in Figure 5 are the average of the values given.

<sup>c</sup>: Values given in picograms of DNA per 2C: points in Figure 5 given at twice this value for comparison to *T. miscellus* and *T. mirus*.

<sup>d</sup>: Genome size taken from the deposited reference sequence at NCBI.

#### References:

1. Wang K, Wang Z, Li F, Ye W, Wang J, Song G, et al. The draft genome of a diploid cotton *Gossypium raimondii*. *Nature genetics*. 2012;44(10):1098-103.
2. Li F, Fan G, Wang K, Sun F, Yuan Y, Song G, et al. Genome sequence of the cultivated cotton *Gossypium arboreum*. *Nature genetics*. 2014;46(6):567-72.
3. Luo M-C, Gu YQ, Puiu D, Wang H, Twardziok SO, Deal KR, et al. Genome sequence of the progenitor of the wheat D genome *Aegilops tauschii*. *Nature*. 2017;551(7681):498-502.
4. Ling H-Q, Ma B, Shi X, Liu H, Dong L, Sun H, et al. Genome sequence of the progenitor of wheat A subgenome *Triticum urartu*. *Nature*. 2018;557(7705):424-8.

5. Avni R, Lux T, Minz-Dub A, Millet E, Sela H, Distelfeld A, et al. Genome sequences of three *Aegilops* species of the section *Sitopsis* reveal phylogenetic relationships and provide resources for wheat improvement. *The Plant Journal*. 2022;110(1):179-92.
6. Jin X, Du H, Zhu C, Wan H, Liu F, Ruan J, et al. Haplotype-resolved genomes of wild octoploid progenitors illuminate genomic diversifications from wild relatives to cultivated strawberry. *Nature Plants*. 2023;9(8):1252-66.
7. Pires JC, Lim KY, Kovarik A, Matyásek R, Boyd A, Leitch AR, et al. Molecular cytogenetic analysis of recently evolved *Tragopogon* (Asteraceae) allopolyploids reveal a karyotype that is additive of the diploid progenitors. *American Journal of Botany*. 2004;91(7):1022-35.
8. Hamon P, Hamon S, Razafinarivo NJ, Guyot R, Siljak-Yakovlev S, Couturon E, et al. Coffee genome organization and evolution. *Coffee in health and disease prevention*: Elsevier; 2015. p. 29-37.
9. Liu S, Liu Y, Yang X, Tong C, Edwards D, Parkin IA, et al. The *Brassica oleracea* genome reveals the asymmetrical evolution of polyploid genomes. *Nat Commun*. 2014;5:3930. doi: 10.1038/ncomms4930. PubMed PMID: 24852848; PubMed Central PMCID: PMC4279128.
10. Wang X, Wang H, Wang J, Sun R, Wu J, Liu S, et al. The genome of the mesopolyploid crop species *Brassica rapa*. *Nature Genetics*. 2011;43(10):1035-9. Epub 2011/08/30. doi: ng.919 [pii] 10.1038/ng.919. PubMed PMID: 21873998.
11. The Arabidopsis Genome I. Analysis of the genome sequence of the flowering plant *Arabidopsis thaliana*. *Nature*. 2000;408(6814):796-815. doi: 10.1038/35048692.
12. Burns R, Mandáková T, Gunis J, Soto-Jiménez LM, Liu C, Lysak MA, et al. Gradual evolution of allopolyploidy in *Arabidopsis suecica*. *Nature Ecology & Evolution*. 2021;5(10):1367-81. doi: 10.1038/s41559-021-01525-w.
